# Supplementary material
Source: HighWire-hosted journal article supplement (https://bmjopen.bmj.com/content/14/12/e084555)
Supplement: inline-supplementary-material-1 [file inline-supplementary-material-1.pdf]

**Supplemental Table 1.** Distribution of study participants (n=280) across the 10 selected villages according to the PPS sampling method.

| Study sites    | Participants <sup>a</sup><br>(n=280) |      |
|----------------|--------------------------------------|------|
|                | n                                    | %    |
| <b>Village</b> |                                      |      |
| Village A      | 4                                    | 1.4  |
| Village B      | 9                                    | 3.2  |
| Village C      | 14                                   | 5.0  |
| Village D      | 20                                   | 7.1  |
| Village E      | 25                                   | 8.9  |
| Village F      | 31                                   | 11.1 |
| Village G      | 36                                   | 12.9 |
| Village H      | 42                                   | 15.0 |
| Village I      | 47                                   | 16.8 |
| Village J      | 52                                   | 18.6 |

<sup>a</sup> the number of participants imply the same number of households (only one eligible participant per household will be selected).

**Note:** the actual names of the villages had been removed for privacy reasons, denotation of village A to J had been used instead
